# Supplementary material for: Visualising associations between paired ‘omics’ data sets
Source: PubMed Central journal article supplement (PMC3630015; doi:10.1186/1756-0381-5-19), 2012-11-13
Supplement: 1756-0381-5-19-S1.pdf [file 1756-0381-5-19-S1.pdf]

### Simulated data details

For the simulate example we generated 100  $X$ -variables and 50  $Y$ -variables with an equal number of 30 observations in each, such that relevant  $X$  and  $Y$  variables were generated according to a normal distribution with zero mean and covariance matrix  $\Sigma$  defined by

$$\Sigma = \begin{bmatrix} \Sigma_{xx} & \Sigma_{xy} \\ \Sigma'_{xy} & \Sigma_{yy} \end{bmatrix}, \quad \Sigma_{xy} = \begin{bmatrix} A_{xy} & 0 & 0 \\ 0 & B_{xy} & 0 \\ 0 & 0 & C_{xy} \end{bmatrix}$$

The matrices that form the basis of these covariances matrices are given below.

*Covariance matrix of relevant  $X$  variables:*

$$\Sigma_{xx} = \begin{bmatrix} A_{xx} & & 0 \\ & B_{xx} & \\ 0 & & C_{xx} \end{bmatrix}$$

matrices  $A_{xx}$ ,  $B_{xx}$  and  $C_{xx}$  are given respectively in the tables S1, S2 and S3:

Table S1:  $A_{xx}$  covariance matrix.

|            | $X_A^1$ | $X_A^2$ | $X_A^3$ | $X_A^4$ | $X_A^5$ | $X_A^6$ | $X_A^7$ | $X_A^8$ | $X_A^9$ | $X_A^{10}$ |
|------------|---------|---------|---------|---------|---------|---------|---------|---------|---------|------------|
| $X_A^1$    | 1.00    |         |         |         |         |         |         |         |         |            |
| $X_A^2$    | 0.85    | 1.00    |         |         |         |         |         |         |         |            |
| $X_A^3$    | 0.87    | 0.85    | 1.00    |         |         |         |         |         |         |            |
| $X_A^4$    | 0.89    | 0.83    | 0.84    | 1.00    |         |         |         |         |         |            |
| $X_A^5$    | 0.87    | 0.90    | 0.90    | 0.90    | 1.00    |         |         |         |         |            |
| $X_A^6$    | 0.90    | 0.89    | 0.92    | 0.89    | 0.94    | 1.00    |         |         |         |            |
| $X_A^7$    | 0.92    | 0.91    | 0.93    | 0.93    | 0.96    | 0.95    | 1.00    |         |         |            |
| $X_A^8$    | 0.89    | 0.83    | 0.90    | 0.94    | 0.94    | 0.93    | 0.96    | 1.00    |         |            |
| $X_A^9$    | 0.86    | 0.86    | 0.93    | 0.90    | 0.91    | 0.95    | 0.96    | 0.92    | 1.00    |            |
| $X_A^{10}$ | 0.82    | 0.84    | 0.90    | 0.86    | 0.92    | 0.92    | 0.95    | 0.90    | 0.92    | 1.00       |

Table S2:  $B_{xx}$  covariance matrix.

|            | $X_B^1$ | $X_B^2$ | $X_B^3$ | $X_B^4$ | $X_B^5$ | $X_B^6$ | $X_B^7$ | $X_B^8$ | $X_B^9$ | $X_B^{10}$ |
|------------|---------|---------|---------|---------|---------|---------|---------|---------|---------|------------|
| $X_B^1$    | 1.00    |         |         |         |         |         |         |         |         |            |
| $X_B^2$    | 0.85    | 1.00    |         |         |         |         |         |         |         |            |
| $X_B^3$    | 0.87    | 0.85    | 1.00    |         |         |         |         |         |         |            |
| $X_B^4$    | 0.89    | 0.83    | 0.84    | 1.00    |         |         |         |         |         |            |
| $X_B^5$    | 0.87    | 0.90    | 0.90    | 0.90    | 1.00    |         |         |         |         |            |
| $X_B^6$    | 0.90    | 0.89    | 0.92    | 0.89    | 0.94    | 1.00    |         |         |         |            |
| $X_B^7$    | 0.92    | 0.91    | 0.93    | 0.93    | 0.96    | 0.95    | 1.00    |         |         |            |
| $X_B^8$    | 0.89    | 0.83    | 0.90    | 0.94    | 0.94    | 0.93    | 0.96    | 1.00    |         |            |
| $X_B^9$    | 0.86    | 0.86    | 0.93    | 0.90    | 0.91    | 0.95    | 0.96    | 0.92    | 1.00    |            |
| $X_B^{10}$ | 0.82    | 0.84    | 0.90    | 0.86    | 0.92    | 0.92    | 0.95    | 0.90    | 0.92    | 1.00       |

Table S3:  $C_{xx}$  covariance matrix.

|         | $X_C^1$ | $X_C^2$ | $X_C^3$ |
|---------|---------|---------|---------|
| $X_C^1$ | 1.00    |         |         |
| $X_C^2$ | 0.94    | 1.00    |         |
| $X_C^3$ | 0.96    | 0.95    | 1.00    |

Covariance matrix of relevant  $Y$  variables:

$$\Sigma_{YY} = \begin{bmatrix} A_{YY} & & 0 \\ & B_{YY} & \\ 0 & & C_{YY} \end{bmatrix}$$

matrices  $A_{YY}$ ,  $B_{YY}$  and  $C_{YY}$  are given respectively in the tables S4, S5 and S6:

Table S4:  $A_{YY}$  covariance matrix.

|            | $Y_A^1$ | $Y_A^2$ | $Y_A^3$ | $Y_A^4$ | $Y_A^5$ | $Y_A^6$ | $Y_A^7$ | $Y_A^8$ | $Y_A^9$ | $Y_A^{10}$ |
|------------|---------|---------|---------|---------|---------|---------|---------|---------|---------|------------|
| $Y_A^1$    | 1.00    |         |         |         |         |         |         |         |         |            |
| $Y_A^2$    | 0.38    | 1.00    |         |         |         |         |         |         |         |            |
| $Y_A^3$    | 0.44    | 0.51    | 1.00    |         |         |         |         |         |         |            |
| $Y_A^4$    | 0.40    | 0.55    | 0.64    | 1.00    |         |         |         |         |         |            |
| $Y_A^5$    | 0.71    | 0.62    | 0.61    | 0.60    | 1.00    |         |         |         |         |            |
| $Y_A^6$    | 0.54    | 0.15    | 0.45    | 0.47    | 0.70    | 1.00    |         |         |         |            |
| $Y_A^7$    | 0.47    | 0.63    | 0.62    | 0.49    | 0.73    | 0.36    | 1.00    |         |         |            |
| $Y_A^8$    | 0.52    | 0.50    | 0.42    | 0.27    | 0.73    | 0.47    | 0.60    | 1.00    |         |            |
| $Y_A^9$    | 0.56    | 0.51    | 0.65    | 0.49    | 0.80    | 0.54    | 0.57    | 0.64    | 1.00    |            |
| $Y_A^{10}$ | 0.48    | 0.34    | 0.39    | 0.33    | 0.69    | 0.49    | 0.47    | 0.49    | 0.65    | 1.00       |

Table S5:  $B_{YY}$  covariance matrix.

|         | $Y_B^1$ | $Y_B^2$ | $Y_B^3$ | $Y_B^4$ | $Y_B^5$ |
|---------|---------|---------|---------|---------|---------|
| $Y_B^1$ | 1.00    |         |         |         |         |
| $Y_B^2$ | 0.61    | 1.00    |         |         |         |
| $Y_B^3$ | 0.51    | 0.32    | 1.00    |         |         |
| $Y_B^4$ | 0.65    | 0.45    | 0.60    | 1.00    |         |
| $Y_B^5$ | 0.64    | 0.68    | 0.54    | 0.68    | 1.00    |

Table S6:  $C_{YY}$  covariance matrix.

|         | $Y_C^1$ | $Y_C^2$ |
|---------|---------|---------|
| $Y_C^1$ | 1.00    |         |
| $Y_C^2$ | -0.96   | 1.00    |

Cross-covariance matrix between relevant  $X$  and  $Y$  variables:

$$\Sigma_{XY} = \begin{bmatrix} A_{XY} & 0 & 0 \\ 0 & B_{XY} & 0 \\ 0 & 0 & C_{XY} \end{bmatrix}$$

matrices  $A_{XY}$ ,  $B_{XY}$  and  $C_{XY}$  are given respectively in the tables S7, S8 and S9:

Table S7:  $A_{XY}$  covariance matrix.

|            | $X_A^1$ | $X_A^2$ | $X_A^3$ | $X_A^4$ | $X_A^5$ | $X_A^6$ | $X_A^7$ | $X_A^8$ | $X_A^9$ | $X_A^{10}$ |
|------------|---------|---------|---------|---------|---------|---------|---------|---------|---------|------------|
| $Y_A^1$    | -0.72   | -0.62   | -0.64   | -0.70   | -0.65   | -0.68   | -0.71   | -0.73   | -0.63   | -0.67      |
| $Y_A^2$    | -0.60   | -0.67   | -0.68   | -0.66   | -0.64   | -0.68   | -0.70   | -0.65   | -0.72   | -0.64      |
| $Y_A^3$    | -0.61   | -0.64   | -0.61   | -0.73   | -0.68   | -0.69   | -0.69   | -0.70   | -0.65   | -0.65      |
| $Y_A^4$    | -0.54   | -0.64   | -0.57   | -0.59   | -0.61   | -0.65   | -0.59   | -0.61   | -0.58   | -0.56      |
| $Y_A^5$    | -0.88   | -0.93   | -0.86   | -0.88   | -0.92   | -0.91   | -0.93   | -0.86   | -0.88   | -0.87      |
| $Y_A^6$    | -0.62   | -0.60   | -0.51   | -0.61   | -0.64   | -0.60   | -0.62   | -0.58   | -0.57   | -0.56      |
| $Y_A^7$    | -0.61   | -0.79   | -0.63   | -0.67   | -0.75   | -0.69   | -0.71   | -0.66   | -0.67   | -0.64      |
| $Y_A^8$    | -0.71   | -0.71   | -0.70   | -0.69   | -0.70   | -0.71   | -0.74   | -0.66   | -0.78   | -0.73      |
| $Y_A^9$    | -0.84   | -0.77   | -0.78   | -0.82   | -0.79   | -0.82   | -0.82   | -0.79   | -0.78   | -0.72      |
| $Y_A^{10}$ | -0.70   | -0.65   | -0.64   | -0.67   | -0.70   | -0.66   | -0.68   | -0.67   | -0.63   | -0.60      |

Table S8:  $B_{XY}$  covariance matrix.

|         | $X_B^1$ | $X_B^2$ | $X_B^3$ | $X_B^4$ | $X_B^5$ | $X_B^6$ | $X_B^7$ | $X_B^8$ | $X_B^9$ | $X_B^{10}$ |
|---------|---------|---------|---------|---------|---------|---------|---------|---------|---------|------------|
| $Y_B^1$ | 0.74    | 0.78    | 0.85    | 0.75    | 0.81    | 0.81    | 0.81    | 0.78    | 0.79    | 0.83       |
| $Y_B^2$ | 0.50    | 0.55    | 0.61    | 0.60    | 0.63    | 0.60    | 0.62    | 0.65    | 0.60    | 0.64       |
| $Y_B^3$ | 0.68    | 0.61    | 0.60    | 0.63    | 0.62    | 0.59    | 0.65    | 0.61    | 0.57    | 0.53       |
| $Y_B^4$ | 0.65    | 0.63    | 0.66    | 0.66    | 0.66    | 0.68    | 0.67    | 0.68    | 0.59    | 0.64       |
| $Y_B^5$ | 0.57    | 0.63    | 0.62    | 0.69    | 0.72    | 0.65    | 0.66    | 0.71    | 0.64    | 0.65       |

Table S9:  $C_{XY}$  covariance matrix.

|         | $X_C^1$ | $X_C^2$ | $X_C^3$ |
|---------|---------|---------|---------|
| $Y_C^1$ | 0.81    | 0.81    | 0.81    |
| $Y_C^2$ | -0.92   | -0.91   | -0.93   |
